# Supplementary material
Source: Springer Nature journal article supplement (https://www.springermedizin.de/resource/supplementary/13014_2010_362_MOESM1_ESM.pdf/9633624)

Probability of tumor control

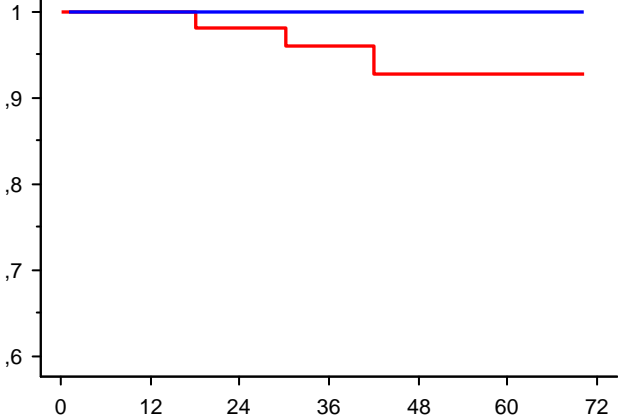

Time (months)

Supplement: MOESM1 [file 9633624]
